# Supplementary material for: Transcriptional profiling of pea ABR17 mediated changes in gene expression in Arabidopsis thaliana
Source: PubMed Central journal article supplement (PMC2559843; doi:10.1186/1471-2229-8-91), 2008-09-10
Supplement: 1471-2229-8-91-S1.pdf [file 1471-2229-8-91-S1.pdf]

**Additional file 1.** Transcriptional profiling: genes exhibiting more than 1.5-fold increase/decrease in transcript abundance in *ABR17* transgenic *A. thaliana* seedlings.

| AGI <sup>a</sup> | Operon annotations                                        | log2 ratio | SE   | p value  |
|------------------|-----------------------------------------------------------|------------|------|----------|
| At5g20230        | plastocyanin-like domain containing protein               | 1.55       | 0.14 | 1.57E-03 |
| At4g36060        | BASIC HELIX-LOOP-HELIX (BHLH)family protein               | 1.49       | 0.19 | 4.33E-03 |
| At5g44420        | plant defensin protein, putative (PDF1.2a)                | 1.40       | 0.38 | 1.48E-02 |
| At5g42040        | hypothetical protein                                      | 1.38       | 0.41 | 2.04E-02 |
| At4g22450        | hypothetical protein                                      | 1.37       | 0.17 | 3.96E-03 |
| At5g44430        | plant defensin protein, putative (PDF1.2c)                | 1.35       | 0.40 | 2.03E-02 |
| At3g45970        | expansin protein family (EXPL1)                           | 1.32       | 0.16 | 1.08E-03 |
| At5g01920        | protein kinase family                                     | 1.24       | 0.22 | 4.47E-03 |
| At2g26010        | plant defensin protein, putative (PDF1.3)                 | 1.17       | 0.35 | 1.97E-02 |
| At5g10040        | expressed protein                                         | 1.04       | 0.31 | 2.79E-02 |
| At1g75830        | plant defensin protein, putative (PDF1.1)                 | 1.04       | 0.30 | 1.72E-02 |
| At2g26020        | plant defensin protein, putative (PDF1.2b)                | 0.96       | 0.26 | 1.47E-02 |
| At1g07135        | glycine-rich protein                                      | 0.95       | 0.19 | 7.89E-03 |
| At1g01560        | mitogen-activated protein kinase (MAPK), putative (MPK11) | 0.94       | 0.10 | 1.08E-02 |
| At3g43850        | hypothetical protein                                      | 0.94       | 0.13 | 5.71E-03 |
| At2g26560        | patatin, putative                                         | 0.90       | 0.12 | 6.39E-04 |
| At5g39890        | expressed protein                                         | 0.88       | 0.18 | 1.59E-02 |
| At1g10070        | tat-binding protein -related                              | 0.88       | 0.06 | 8.70E-04 |
| At2g22860        | (AtPSK) phytosulfokine precursor 2                        | 0.85       | 0.06 | 8.02E-04 |
| At5g52760        | heavy-metal-associated domain-containing protein          | 0.85       | 0.20 | 1.31E-02 |
| At2g27080        | expressed protein                                         | 0.82       | 0.16 | 1.31E-02 |
| At1g19530        | expressed protein                                         | 0.82       | 0.19 | 1.29E-02 |
| At3g55980        | expressed protein                                         | 0.82       | 0.19 | 2.41E-02 |
| At2g47880        | glutaredoxin protein family                               | 0.82       | 0.22 | 3.43E-02 |
| At3g62680        | proline-rich protein family                               | 0.82       | 0.11 | 4.77E-03 |
| At4g14365        | expressed protein                                         | 0.82       | 0.11 | 1.57E-03 |

|            |                                                                               |      |      |          |
|------------|-------------------------------------------------------------------------------|------|------|----------|
| At3g15500  | No apical meristem (NAM) protein family                                       | 0.82 | 0.06 | 6.96E-04 |
| At2g26560  | patatin, putative                                                             | 0.81 | 0.15 | 3.09E-03 |
| At1g56240  | F-box protein (SKP1 interacting partner 3-related)                            | 0.80 | 0.12 | 6.07E-03 |
| At1g08630  | expressed protein                                                             | 0.79 | 0.22 | 2.27E-02 |
| At1g77120  | alcohol dehydrogenase (ADH)                                                   | 0.78 | 0.20 | 2.91E-02 |
| At2g14610  | pathogenesis-related protein 1 (PR-1)                                         | 0.77 | 0.15 | 3.27E-03 |
| At1g75040  | pathogenesis-related protein 5 (PR-5)                                         | 0.77 | 0.08 | 2.21E-03 |
| At1g02660  | Arabidopsis thaliana chromosome I BAC T14P4 genomic sequence                  | 0.76 | 0.04 | 3.61E-04 |
| At5g45340  | cytochrome P450 family                                                        | 0.76 | 0.19 | 2.73E-02 |
| At2g18690  | expressed protein                                                             | 0.75 | 0.19 | 1.59E-02 |
| At3g49160  | pyruvate kinase -related protein                                              | 0.75 | 0.10 | 4.35E-03 |
| At1g72940  | disease resistance protein (TIR-NBS class), putative                          | 0.75 | 0.08 | 7.77E-04 |
| At1g18570  | myb family transcription factor                                               | 0.75 | 0.11 | 6.98E-03 |
| At1g76410  | RING zinc finger protein -related                                             | 0.75 | 0.06 | 1.20E-03 |
| A005153_01 | Arabidopsis thaliana RESISTANCE TO POWDERY MILDEW8 (RPW8) locus, complete cds | 0.74 | 0.09 | 4.61E-04 |
| At2g35290  | expressed protein                                                             | 0.73 | 0.06 | 1.50E-03 |
| At2g38470  | WRKY family transcription factor                                              | 0.73 | 0.16 | 1.11E-02 |
| At1g80840  | WRKY family transcription factor                                              | 0.70 | 0.18 | 2.80E-02 |
| At4g30280  | xyloglucan endotransglycosylase, putative                                     | 0.70 | 0.12 | 4.58E-03 |
| At5g54710  | Arabidopsis thaliana genomic DNA, chromosome 5, TAC clone:K5F14               | 0.70 | 0.19 | 3.51E-02 |
| At2g40000  | nematode-resistance protein -related                                          | 0.70 | 0.11 | 1.61E-03 |
| At2g31945  | expressed protein                                                             | 0.68 | 0.03 | 2.21E-04 |
| At1g72060  | expressed protein                                                             | 0.68 | 0.10 | 1.11E-03 |
| At5g46710  | expressed protein                                                             | 0.67 | 0.10 | 7.05E-03 |
| At2g15890  | expressed protein                                                             | 0.67 | 0.10 | 1.09E-03 |
| At1g69490  | No apical meristem (NAM) protein family                                       | 0.67 | 0.08 | 4.09E-03 |
| At4g31800  | WRKY family transcription factor                                              | 0.66 | 0.14 | 5.83E-03 |
| At1g21400  | branched-chain alpha keto-acid dehydrogenase -related                         | 0.66 | 0.13 | 7.79E-03 |
| At3g49960  | peroxidase, putative                                                          | 0.66 | 0.03 | 1.30E-04 |
| At5g47230  | ethylene responsive element binding factor 5 (AtERF5)                         | 0.66 | 0.19 | 1.67E-02 |

|           |                                                                                               |       |      |          |
|-----------|-----------------------------------------------------------------------------------------------|-------|------|----------|
| At1g07000 | exocyst subunit EXO70 family                                                                  | 0.65  | 0.06 | 4.28E-04 |
| At1g28330 | dormancy-associated protein -related                                                          | 0.65  | 0.12 | 3.02E-03 |
| At1g02660 | lipase (class 3) family                                                                       | 0.64  | 0.22 | 3.20E-02 |
| At4g25920 | expressed protein                                                                             | 0.64  | 0.18 | 3.51E-02 |
| At1g05250 | peroxidase, putative                                                                          | 0.64  | 0.08 | 3.80E-03 |
| At1g02640 | glycosyl hydrolase family 3                                                                   | 0.64  | 0.09 | 5.66E-03 |
| At4g10270 | probable wound-induced protein                                                                | 0.64  | 0.07 | 2.06E-04 |
| At4g11890 | protein kinase family                                                                         | 0.64  | 0.10 | 8.57E-03 |
| At4g02270 | expressed protein                                                                             | 0.62  | 0.17 | 3.32E-02 |
| At2g14900 | gibberellin-regulated proteins -related                                                       | 0.62  | 0.12 | 1.38E-02 |
| At3g23170 | expressed protein                                                                             | 0.62  | 0.04 | 1.05E-04 |
| At2g19190 | light repressible receptor protein kinase, putative                                           | 0.62  | 0.11 | 1.17E-02 |
| At5g58660 | oxidoreductase, 2OG-Fe(II) oxygenase family                                                   | 0.62  | 0.12 | 1.48E-02 |
| At2g18150 | peroxidase, putative                                                                          | 0.61  | 0.16 | 1.74E-02 |
| At1g02610 | Arabidopsis thaliana chromosome I BAC T14P4 genomic sequence                                  | 0.61  | 0.10 | 8.02E-03 |
| At5g13080 | WRKY family transcription factor                                                              | 0.60  | 0.16 | 3.31E-02 |
| At2g17040 | No apical meristem (NAM) protein family                                                       | 0.59  | 0.16 | 3.56E-02 |
| At4g23160 | hypothetical protein                                                                          | 0.59  | 0.08 | 5.84E-03 |
| At3g08720 | ribosomal-protein S6 kinase (ATPK19) -related                                                 | 0.59  | 0.07 | 2.90E-03 |
| At2g41640 | expressed protein                                                                             | 0.59  | 0.13 | 1.93E-02 |
| At3g10040 | expressed protein                                                                             | 0.59  | 0.08 | 5.30E-03 |
| At2g35460 | harpin-induced protein 1 family (HIN1)                                                        | 0.58  | 0.11 | 6.25E-03 |
| At5g57020 | N-myristoyl transferase                                                                       | -0.59 | 0.09 | 1.30E-03 |
| At2g41650 | expressed protein                                                                             | -0.60 | 0.07 | 1.07E-03 |
| At1g19150 | Arabidopsis thaliana PSI type II chlorophyll a/b-binding protein (Lhca2*1) mRNA, complete cds | -0.60 | 0.08 | 5.66E-04 |
| At1g64390 | glycosyl hydrolase family 9 (endo-1,4-beta-glucanase)                                         | -0.60 | 0.15 | 2.77E-02 |
| At5g02230 | haloacid dehalogenase-like hydrolase family                                                   | -0.60 | 0.07 | 3.64E-03 |
| At1g62180 | phosphoadenylyl-sulfate reductase (thioredoxin) (PAPS reductase), putative                    | -0.61 | 0.07 | 3.39E-04 |
| At5g06530 | ABC transporter family protein                                                                | -0.63 | 0.13 | 5.33E-03 |
| At2g03090 | expansin, putative (EXP15)                                                                    | -0.63 | 0.14 | 2.03E-02 |

|           |                                                                            |       |      |          |
|-----------|----------------------------------------------------------------------------|-------|------|----------|
| At5g23060 | expressed protein                                                          | -0.63 | 0.06 | 1.75E-04 |
| At4g16370 | isp4 like protein                                                          | -0.64 | 0.07 | 2.52E-03 |
| At1g23740 | oxidoreductase, zinc-binding dehydrogenase family                          | -0.65 | 0.07 | 2.74E-04 |
| At4g36030 | armadillo repeat containing protein                                        | -0.65 | 0.15 | 2.19E-02 |
| At4g37980 | mannitol dehydrogenase (ELI3-1), putative                                  | -0.65 | 0.16 | 2.66E-02 |
| At2g05100 | light-harvesting chlorophyll a/b binding protein                           | -0.66 | 0.11 | 2.23E-03 |
| At1g44000 | expressed protein                                                          | -0.68 | 0.12 | 4.24E-03 |
| At2g31380 | salt tolerance-like protein                                                | -0.68 | 0.08 | 8.32E-04 |
| At1g01060 | myb family transcription factor                                            | -0.70 | 0.04 | 6.04E-05 |
| At5g48490 | protease inhibitor/seed storage/lipid transfer protein (LTP) family        | -0.71 | 0.18 | 1.14E-02 |
| At1g73870 | CONSTANS B-box zinc finger family protein                                  | -0.71 | 0.20 | 3.75E-02 |
| At3g47420 | glycerol-3-phosphate transporter (glycerol 3-phosphate permease), putative | -0.72 | 0.11 | 2.56E-03 |
| At4g26850 | expressed protein                                                          | -0.72 | 0.08 | 2.54E-04 |
| At5g55570 | hypothetical protein                                                       | -0.72 | 0.13 | 5.63E-03 |
| At5g67370 | expressed protein                                                          | -0.73 | 0.09 | 3.82E-03 |
| At5g05250 | expressed protein                                                          | -0.75 | 0.08 | 2.30E-03 |
| At5g05270 | chalcone-flavanone isomerase family                                        | -0.75 | 0.06 | 1.16E-03 |
| At3g02380 | Zinc finger protein CONSTANS-LIKE 2 (COL2)                                 | -0.75 | 0.06 | 2.31E-04 |
| At5g53450 | protein kinase family                                                      | -0.76 | 0.11 | 2.12E-03 |
| At3g27690 | light harvesting chlorophyll A/B binding protein, putative                 | -0.77 | 0.19 | 9.36E-03 |
| At5g02120 | one helix protein (OHP)                                                    | -0.90 | 0.09 | 1.66E-04 |
| At5g48850 | male sterility MS5 family                                                  | -0.99 | 0.17 | 9.96E-03 |
| At1g56430 | nicotianamine synthase, putative                                           | -1.13 | 0.08 | 8.78E-04 |
| At3g56980 | bHLH protein family                                                        | -1.36 | 0.13 | 1.91E-03 |

All expression ratios are significant ( $\alpha=0.05$ ) and are in a log<sub>2</sub> scale where fold change is ABR17/WT.

AGI <sup>a</sup> – *Arabidopsis* Genome Initiative SE <sup>b</sup> - Standard error
