# Supplementary material for: Transcriptional profiling of pea ABR17 mediated changes in gene expression in Arabidopsis thaliana
Source: PubMed Central journal article supplement (PMC2559843; doi:10.1186/1471-2229-8-91), 2008-09-10
Supplement: 1471-2229-8-91-S2.pdf [file 1471-2229-8-91-S2.pdf]

**Additional file 3.** Transcriptional profiling: genes exhibiting more than 4-fold increase/decrease in transcript abundance in salt-treated Wild type *A. thaliana* seedlings.

| AGI <sup>a</sup> | Operon annotation                                                     | log2 scale | SE   | p value  |
|------------------|-----------------------------------------------------------------------|------------|------|----------|
| A023244_01       | Arabidopsis thaliana ABA-regulated gene cluster, complete sequence    | 3.96       | 0.82 | 1.67E-02 |
| A023734_01       | Genomic sequence for Arabidopsis thaliana BAC F15O4 from chromosome I | 3.94       | 0.59 | 1.15E-03 |
| At1g54010        | ESTs                                                                  | 3.90       | 0.28 | 3.55E-05 |
| At2g38530        | nonspecific lipid transfer protein 2 (LTP 2)                          | 3.62       | 0.18 | 5.06E-06 |
| At4g13220        | expressed protein                                                     | 3.59       | 0.35 | 1.60E-04 |
| At2g02990        | ribonuclease, RNS1                                                    | 3.59       | 0.22 | 5.15E-04 |
| At4g12500        | protease inhibitor/seed storage/lipid transfer protein (LTP) family   | 3.45       | 0.21 | 1.43E-05 |
| At2g03760        | steroid sulfotransferase, putative                                    | 3.45       | 0.06 | 2.90E-08 |
| At4g12490        | protease inhibitor/seed storage/lipid transfer protein (LTP) family   | 3.40       | 0.16 | 4.34E-06 |
| At2g43620        | glycosyl hydrolase family 19 (chitinase)                              | 3.38       | 0.24 | 3.57E-05 |
| At4g04220        | disease resistance protein family                                     | 3.33       | 0.24 | 3.28E-05 |
| At3g57470        | protease-related protein                                              | 3.19       | 0.50 | 1.36E-03 |
| At4g12470        | protease inhibitor/seed storage/lipid transfer protein (LTP) family   | 3.17       | 0.11 | 1.15E-06 |
| At3g43180        | zinc finger (C3HC4-type RING finger) protein family                   | 3.09       | 0.09 | 4.61E-07 |
| At5g43570        | hypothetical protein                                                  | 3.01       | 0.16 | 7.96E-06 |
| At1g62420        | expressed protein                                                     | 2.91       | 0.31 | 6.88E-04 |
| At3g60140        | glycosyl hydrolase family 1, beta-glucosidase                         | 2.91       | 0.30 | 6.35E-04 |
| At1g69930        | glutathione transferase, putative                                     | 2.81       | 0.13 | 2.15E-04 |
| At3g44040        | hypothetical protein                                                  | 2.76       | 0.58 | 8.98E-03 |
| At3g02240        | expressed protein                                                     | 2.71       | 0.17 | 1.56E-05 |
| At4g02330        | expressed protein                                                     | 2.69       | 0.12 | 2.19E-04 |
| At2g43510        | trypsin inhibitor -related                                            | 2.67       | 0.13 | 4.93E-06 |
| At5g24640        | expressed protein                                                     | 2.58       | 0.36 | 8.02E-04 |
| At5g43580        | hypothetical protein                                                  | 2.52       | 0.61 | 8.88E-03 |

|           |                                                                        |      |      |          |
|-----------|------------------------------------------------------------------------|------|------|----------|
| At4g11650 | osmotin-like protein (OSM34)                                           | 2.52 | 0.23 | 1.06E-04 |
| At3g29970 | germination protein -related                                           | 2.50 | 0.22 | 8.26E-05 |
| At5g42830 | hydroxycinnamoyl benzoyltransferase-related                            | 2.49 | 0.19 | 4.23E-05 |
| At2g34600 | expressed protein                                                      | 2.48 | 0.55 | 2.06E-02 |
| At2g16060 | class 1 non-symbiotic hemoglobin (AHB1)                                | 2.40 | 0.22 | 1.01E-04 |
| At3g02480 | expressed protein                                                      | 2.40 | 0.24 | 1.85E-04 |
| At2g13510 | hypothetical protein                                                   | 2.38 | 0.57 | 1.37E-02 |
| At5g14180 | expressed protein                                                      | 2.36 | 0.30 | 5.10E-04 |
| At4g25810 | xyloglucan endotransglycosylase (XTR-6)                                | 2.35 | 0.54 | 7.14E-03 |
| At3g21720 | isocitrate lyase -related                                              | 2.34 | 0.25 | 2.14E-04 |
| At5g01330 | pyruvate decarboxylase-related protein                                 | 2.34 | 0.19 | 1.15E-03 |
| At1g10585 | Genomic sequence for Arabidopsis thaliana BAC T10O24 from Chromosome 1 | 2.33 | 0.13 | 6.58E-05 |
| At1g17020 | oxidoreductase, 2OG-Fe(II) oxygenase family                            | 2.32 | 0.11 | 4.15E-06 |
| At5g36925 | expressed protein                                                      | 2.32 | 0.10 | 2.94E-06 |
| At2g19800 | expressed protein                                                      | 2.31 | 0.16 | 3.00E-05 |
| At1g21910 | transcription factor TINY family                                       | 2.29 | 0.16 | 3.31E-05 |
| At4g12530 | protease inhibitor/seed storage/lipid transfer protein (LTP) family    | 2.28 | 0.57 | 2.82E-02 |
| At2g18490 | C2H2-type zinc finger protein -related                                 | 2.26 | 0.22 | 1.48E-04 |
| At2g30840 | 2-oxoglutarate-dependent dioxygenase, putative                         | 2.26 | 0.22 | 1.38E-04 |
| At3g08860 | alanine--glyoxylate aminotransferase , putative                        | 2.25 | 0.16 | 7.38E-04 |
| At4g12480 | protease inhibitor/seed storage/lipid transfer protein (LTP) family    | 2.25 | 0.33 | 9.84E-04 |
| At4g08870 | arginase -related                                                      | 2.25 | 0.15 | 2.56E-05 |
| At4g36700 | cupin domain-containing protein                                        | 2.22 | 0.65 | 1.86E-02 |
| At5g36920 | hypothetical protein                                                   | 2.19 | 0.15 | 3.04E-05 |
| At5g13330 | AP2 domain transcription factor family                                 | 2.16 | 0.17 | 5.76E-05 |
| At5g01920 | protein kinase family                                                  | 2.16 | 0.35 | 1.66E-03 |
| At3g46270 | expressed protein                                                      | 2.15 | 0.10 | 4.22E-06 |
| At1g30700 | FAD-linked oxidoreductase family                                       | 2.13 | 0.22 | 6.71E-04 |
| At5g24030 | expressed protein                                                      | 2.12 | 0.34 | 1.59E-03 |
| At1g42040 | hypothetical protein                                                   | 2.09 | 0.28 | 6.50E-04 |
| At5g64120 | A.thaliana mRNA for peroxidase ATP15a, clone EST 151A15T7              | 2.08 | 0.20 | 1.44E-04 |

|           |                                                                         |       |      |          |
|-----------|-------------------------------------------------------------------------|-------|------|----------|
| At5g19550 | aspartate aminotransferase, cytoplasmic isozyme 1 (transaminase A/Asp2) | 2.08  | 0.11 | 6.12E-06 |
| At2g36780 | UDP-glycosyltransferase family                                          | 2.08  | 0.14 | 2.25E-05 |
| At4g30290 | xyloglucan endotransglycosylase, putative                               | 2.06  | 0.13 | 1.68E-05 |
| At4g36430 | peroxidase, putative                                                    | 2.06  | 0.45 | 1.03E-02 |
| At3g51860 | cation exchanger, putative (CAX3)                                       | 2.05  | 0.24 | 1.09E-03 |
| At1g35140 | phosphate-induced (phi-1) protein -related                              | 2.05  | 0.29 | 8.67E-04 |
| At2g36770 | glycosyltransferase family                                              | 2.04  | 0.11 | 3.17E-04 |
| At4g09600 | gibberellin-regulated protein GASA3 precursor                           | 2.04  | 0.17 | 3.02E-04 |
| At4g15910 | drought-induced protein (Di21)                                          | 2.03  | 0.08 | 1.49E-06 |
| At4g05390 | ferredoxin--NADP(+) reductase (adrenodoxin reductase), putative         | 2.02  | 0.22 | 2.80E-04 |
| At4g01700 | glycosyl hydrolase family 19 (chitinase)                                | 2.02  | 0.17 | 7.58E-05 |
| At2g44370 | CHP-rich zinc finger protein, putative                                  | 2.01  | 0.14 | 3.50E-05 |
| At4g37870 | Genomic sequence for Arabidopsis thaliana BAC F15O4 from chromosome I   | 2.01  | 0.13 | 2.46E-05 |
| At4g16260 | glycosyl hydrolase family 17                                            | 2.01  | 0.21 | 2.35E-04 |
| At5g06330 | harpin-induced protein, putative (HIN1)                                 | 2.00  | 0.24 | 1.10E-03 |
| At5g22580 | expressed protein                                                       | -2.00 | 0.20 | 1.66E-04 |
| At4g26850 | expressed protein                                                       | -2.00 | 0.11 | 9.73E-06 |
| At3g04210 | disease resistance protein (TIR-NBS class), putative                    | -2.00 | 0.20 | 5.13E-04 |
| At1g25440 | CONSTANS B-box zinc finger family protein                               | -2.02 | 0.16 | 5.55E-05 |
| At3g08940 | chlorophyll a/b-binding protein -related                                | -2.03 | 0.18 | 1.05E-04 |
| At3g19320 | leucine rich repeat protein family                                      | -2.03 | 0.06 | 3.65E-07 |
| At3g54890 | light-harvesting chlorophyll a/b binding protein                        | -2.04 | 0.17 | 6.52E-05 |
| At3g51750 | expressed protein                                                       | -2.06 | 0.34 | 9.07E-03 |
| At5g04550 | expressed protein                                                       | -2.07 | 0.38 | 2.93E-03 |
| At1g62360 | homeobox protein -related                                               | -2.07 | 0.45 | 1.97E-02 |
| At3g45160 | expressed protein                                                       | -2.08 | 0.10 | 5.18E-06 |
| At1g29420 | auxin-induced (indole-3-acetic acid induced) protein family             | -2.08 | 0.16 | 2.12E-04 |
| At1g14150 | PsbQ domain protein family                                              | -2.10 | 0.10 | 4.07E-06 |
| At3g17930 | expressed protein                                                       | -2.11 | 0.21 | 6.08E-04 |
| At5g17670 | expressed protein                                                       | -2.11 | 0.37 | 2.32E-03 |
| At5g09660 | malate dehydrogenase, glyoxysomal                                       | -2.11 | 0.15 | 3.73E-05 |

|           |                                                                          |       |      |          |
|-----------|--------------------------------------------------------------------------|-------|------|----------|
| At3g03830 | auxin-induced (indole-3-acetic acid induced) protein, putative           | -2.12 | 0.26 | 1.28E-03 |
| At4g24700 | expressed protein                                                        | -2.12 | 0.10 | 2.44E-04 |
| At3g62960 | glutaredoxin protein family                                              | -2.13 | 0.17 | 5.93E-05 |
| At2g39470 | oxygen-evolving complex 25.6 kD protein, chloroplast precursor, putative | -2.14 | 0.28 | 1.48E-03 |
| At3g04140 | expressed protein                                                        | -2.14 | 0.12 | 1.09E-05 |
| At1g78020 | senescence-associated protein -related                                   | -2.14 | 0.13 | 1.77E-05 |
| At5g18030 | auxin-induced (indole-3-acetic acid induced) protein, putative           | -2.14 | 0.31 | 9.44E-04 |
| At2g47880 | glutaredoxin protein family                                              | -2.16 | 0.16 | 3.48E-05 |
| At2g26500 | expressed protein                                                        | -2.16 | 0.13 | 1.58E-05 |
| At5g61980 | ARF GTPase-activating domain-containing protein                          | -2.16 | 0.58 | 1.33E-02 |
| At1g32080 | expressed protein                                                        | -2.17 | 0.08 | 1.00E-06 |
| At5g48570 | peptidylprolyl isomerase                                                 | -2.18 | 0.37 | 2.08E-03 |
| At1g68010 | glycerate dehydrogenase (NADH-dependent hydroxypyruvate reductase) (HPR) | -2.18 | 0.17 | 4.56E-05 |
| At1g51300 | Arabidopsis thaliana chromosome I BAC F11M15 genomic sequence            | -2.19 | 0.42 | 6.33E-03 |
| At5g24580 | copper-binding protein family                                            | -2.22 | 0.30 | 5.29E-03 |
| At3g14200 | DnaJ protein family                                                      | -2.23 | 0.35 | 1.41E-03 |
| At1g12080 | expressed protein                                                        | -2.23 | 0.39 | 4.52E-03 |
| At2g45660 | MADS-box protein (AGL20)                                                 | -2.24 | 0.12 | 4.70E-05 |
| At1g61520 | light-harvesting chlorophyll a/b binding protein                         | -2.24 | 0.13 | 1.11E-05 |
| At4g17460 | homeobox-leucine zipper protein HAT1 (HD-Zip protein 1)                  | -2.24 | 0.35 | 1.35E-03 |
| At2g26020 | plant defensin protein, putative (PDF1.2b)                               | -2.27 | 0.47 | 4.90E-03 |
| At5g45820 | CBL-interacting protein kinase 20                                        | -2.29 | 0.31 | 7.16E-04 |
| At3g28830 | expressed protein                                                        | -2.30 | 0.20 | 8.10E-05 |
| At5g54270 | light-harvesting chlorophyll a/b binding protein, putative               | -2.32 | 0.27 | 3.58E-04 |
| At3g51895 | sulfate transporter ATST1                                                | -2.34 | 0.08 | 8.76E-06 |
| At4g10540 | Arabidopsis thaliana BAC F3H7                                            | -2.35 | 0.10 | 1.86E-05 |
| At5g02160 | expressed protein                                                        | -2.35 | 0.09 | 1.88E-06 |
| At3g59370 | expressed protein                                                        | -2.36 | 0.31 | 5.94E-04 |
| At3g16120 | dynein light chain protein -related                                      | -2.37 | 0.45 | 1.37E-02 |
| At5g44780 | expressed protein                                                        | -2.38 | 0.08 | 9.73E-05 |
| At2g06230 | hypothetical protein                                                     | -2.38 | 0.23 | 1.37E-04 |

|           |                                                                          |       |      |          |
|-----------|--------------------------------------------------------------------------|-------|------|----------|
| At3g15270 | squamosa promoter binding protein-related 5                              | -2.41 | 0.61 | 2.92E-02 |
| At1g74310 | heat shock protein 101 (HSP101)                                          | -2.42 | 0.31 | 5.31E-04 |
| At3g47070 | expressed protein                                                        | -2.44 | 0.22 | 4.08E-04 |
| At4g21650 | Arabidopsis thaliana DNA chromosome 4, BAC clone F17L22 (ESSAII project) | -2.45 | 0.41 | 1.86E-03 |
| At4g11320 | cysteine proteinase                                                      | -2.47 | 0.20 | 5.69E-05 |
| At1g77490 | thylakoid-bound ascorbate peroxidase, putative (tAPX)                    | -2.51 | 0.19 | 9.75E-04 |
| At5g44420 | plant defensin protein, putative (PDF1.2a)                               | -2.51 | 0.21 | 7.05E-05 |
| At1g29450 | auxin-induced (indole-3-acetic acid induced) protein, putative           | -2.53 | 0.19 | 4.16E-05 |
| At1g09340 | RNA-binding protein -related                                             | -2.57 | 0.12 | 3.55E-06 |
| At5g18080 | auxin-induced (indole-3-acetic acid induced) protein, putative           | -2.58 | 0.16 | 1.70E-05 |
| At4g15460 | glycine-rich protein                                                     | -2.60 | 0.14 | 4.40E-05 |
| At4g12830 | hydrolase, alpha/beta fold family                                        | -2.60 | 0.18 | 7.77E-04 |
| At5g42040 | hypothetical protein                                                     | -2.61 | 0.19 | 3.65E-05 |
| At2g33810 | squamosa-promoter binding protein -related                               | -2.61 | 0.66 | 2.86E-02 |
| At5g44430 | plant defensin protein, putative (PDF1.2c)                               | -2.62 | 0.17 | 2.22E-05 |
| At2g40610 | expansin, putative (EXP8)                                                | -2.66 | 0.08 | 5.28E-05 |
| At3g15540 | auxin-responsive protein IAA19 (Indoleacetic acid-induced protein 19)    | -2.68 | 0.22 | 2.78E-04 |
| At5g64770 | expressed protein                                                        | -2.69 | 0.20 | 3.66E-05 |
| At4g00755 | F-box protein family                                                     | -2.70 | 0.25 | 1.18E-04 |
| At4g26530 | fructose-bisphosphate aldolase, putative                                 | -2.72 | 0.25 | 4.07E-04 |
| At5g22430 | expressed protein                                                        | -2.73 | 0.50 | 2.78E-03 |
| At1g29490 | Arabidopsis thaliana chromosome 1 BAC F15D2 genomic sequence             | -2.80 | 0.21 | 9.65E-04 |
| At3g32130 | Arabidopsis thaliana genomic DNA, chromosome 3, BAC clone: F1M23         | -2.81 | 0.05 | 2.02E-08 |
| At5g18010 | auxin-induced (indole-3-acetic acid induced) protein, putative           | -2.83 | 0.11 | 1.98E-06 |
| At1g58520 | ERD4 protein-related                                                     | -2.83 | 0.31 | 8.10E-04 |
| At5g18020 | auxin-induced (indole-3-acetic acid induced) protein, putative           | -2.89 | 0.18 | 1.63E-05 |
| At1g29460 | auxin-induced (indole-3-acetic acid induced) protein, putative           | -2.89 | 0.10 | 8.06E-07 |
| At2g26010 | plant defensin protein, putative (PDF1.3)                                | -2.95 | 0.16 | 7.57E-06 |
| At5g58770 | dehydrodolichyl diphosphate synthase [DEDOL-PP synthase], putative       | -2.95 | 0.42 | 8.48E-04 |
| At1g67870 | glycine-rich protein                                                     | -2.97 | 0.18 | 1.52E-05 |
| At5g39860 | bHLH protein                                                             | -2.98 | 0.10 | 7.72E-05 |

|           |                                                                     |       |      |          |
|-----------|---------------------------------------------------------------------|-------|------|----------|
| At4g39800 | myo-inositol-1-phosphate synthase                                   | -2.99 | 0.17 | 1.06E-05 |
| At3g09440 | heat shock protein hsc70-3 (hsc70.3)                                | -3.03 | 0.22 | 3.37E-05 |
| At4g21640 | subtilisin-related protease                                         | -3.04 | 0.31 | 1.79E-04 |
| At2g15020 | expressed protein                                                   | -3.04 | 0.42 | 5.34E-03 |
| At4g28395 | lipid transfer protein, putative                                    | -3.14 | 0.64 | 1.64E-02 |
| At2g40300 | ferritin -related                                                   | -3.19 | 0.17 | 7.83E-06 |
| At1g29510 | auxin-induced (indole-3-acetic acid induced) protein, putative      | -3.27 | 0.13 | 1.95E-06 |
| At3g24500 | ethylene-responsive transcriptional coactivator -related            | -3.34 | 0.29 | 9.21E-05 |
| At1g29430 | auxin-induced (indole-3-acetic acid induced) protein family         | -3.63 | 0.29 | 5.77E-05 |
| At5g62080 | protease inhibitor/seed storage/lipid transfer protein (LTP) family | -3.78 | 0.68 | 1.17E-02 |
| At1g23130 | Bet v I allergen family                                             | -3.89 | 0.06 | 1.21E-08 |
| At4g14400 | Arabidopsis thaliana DNA chromosome 4, contig fragment No. 38       | -3.90 | 0.39 | 1.75E-04 |
| At1g67860 | expressed protein                                                   | -4.04 | 0.26 | 1.90E-05 |
| At5g35480 | expressed protein                                                   | -4.12 | 0.18 | 3.16E-06 |

---

All expression ratios are significant ( $\alpha=0.05$ ) and are in a log<sub>2</sub> scale where fold change is salt-treated wild type/control wild type.

AGI<sup>a</sup> – *Arabidopsis* Genome Initiative SE<sup>b</sup> - Standard error
