# Supplementary material for: Transcriptional profiling of pea ABR17 mediated changes in gene expression in Arabidopsis thaliana
Source: PubMed Central journal article supplement (PMC2559843; doi:10.1186/1471-2229-8-91), 2008-09-10
Supplement: 1471-2229-8-91-S3.pdf [file 1471-2229-8-91-S3.pdf]

**Additional file 3.** List of primers used in qRT-PCR

| Gene                                                                     | Primer pairs and probe used in real time PCR                                                                       |
|--------------------------------------------------------------------------|--------------------------------------------------------------------------------------------------------------------|
| <i>AtExpansin</i><br><i>AT3G45970.1</i>                                  | Forward; 5'-CTCCTCTGCCTCTGCTCTCTCT-3'<br>Reverse; 5'-TCCGGCGAAGAAACTCGTA-3'<br>Probe; 5'-TGTGCTTATGGCTCTATG-3'     |
| <i>AtGlycine-rich protein</i><br><i>AT1G07135.1</i>                      | Forward; 5'-GGGTGGTTCCGATTCATACG-3'<br>Reverse; 5'-TGTGATCCTGCCGATCCA-3'<br>Probe; 5'-TGGTAATGGCAGTCTGG-3'         |
| <i>AtMitogen-activated protein kinase (AtMAPK)</i><br><i>AT1G01560.1</i> | Forward; 5'-GGCTTGCGAGGACTAAATCAGA-3'<br>Reverse; 5'-GCTCGGTACCAACGTGTAACAA-3'<br>Probe; 5'-ACAGACTTCATGACAGAAT-3' |
| <i>AtPlant defensin protein PDF1.2a</i><br><i>AT5G44420.1</i>            | Forward; 5'-CCCTTATCTTCGCTGCTCTTGT-3'<br>Reverse; 5'-TTCTGTGCTTCCACCATTGC-3'<br>Probe; 5'-CTCTTTGCTGCTTTCGA-3'     |
| <i>AtIsopentenyltransferase (IPT)1</i><br><i>AT1G68460</i>               | Forward; 5'-CGCCGGTGGATCTAACTCTTT-3'<br>Reverse; 5'-AACTTTGGGTCGAATCGTTGA-3'<br>Probe; 5'-TCCACGCACTCTTAG-3'       |

|                     |                                           |
|---------------------|-------------------------------------------|
| <i>AtIPT2</i>       | Forward; 5'-TGGAATGCGCAAGTGGTTAA-3'       |
| <i>AT2G27760</i>    | Reverse; 5'-TTCGGTTTCTGTCTCCAGGAA-3'      |
|                     | Probe; 5'-TGCTTCAGAGATCATCAG-3'           |
| <hr/> <i>AtIPT3</i> | Forward; 5'-TTTCCGGAGTTTGACAGGTTTT-3'     |
| <i>AT3G63110</i>    | Reverse; 5'-CAGTTCTTCTCTGTCTTCCACATTCA-3' |
|                     | Probe; 5'-CAGGAACGAGCAGTTC-3'             |
| <hr/> <i>AtIPT4</i> | Forward; 5'-TGGAGTGCCACATCACCTTCT-3'      |
| <i>AT4G24650</i>    | Reverse; 5'-ATTCTGCCGCTGTGACTTCTC-3'      |
|                     | Probe; 5'-TGA ACTAAACCCGGAGGC-3'          |
| <hr/> <i>AtIPT5</i> | Forward; 5'-GCCGGTGGTTCCAATTCTT-3'        |
| <i>AT5G19040</i>    | Reverse; 5'-CGGAAGTCAACGCAATCGT-3'        |
|                     | Probe; 5'-CATCGAGGCTCTGGTC-3'             |
| <hr/> <i>AtIPT6</i> | Forward; 5'-GACGCTACGGCGGCAAT-3'          |
| <i>AT1G25410</i>    | Reverse; 5'-CCTTCTCCCTTTGCCGTA CTT-3'     |
|                     | Probe; 5'-ATGGCTGAGCTGAATC-3'             |
| <hr/> <i>AtIPT7</i> | Forward; 5'-CATTTGGGTCGACGTTTCCT-3'       |
| <i>NM_113267</i>    | Reverse; 5'-GCCGTCGACACGTTTTGAG-3'        |

|                                   |                                         |
|-----------------------------------|-----------------------------------------|
|                                   | Probe; 5'-CCCGTACTTAACTCCTTT-3'         |
| <i>AtIPT8</i>                     | Forward; 5'-CCGGATCAGGCAAGTCATG-3'      |
| <i>AT3G19160</i>                  | Reverse; 5'-CGATCTCGCCAGAGAAACG-3'      |
|                                   | Probe; 5'-CTCTCAATCGATCTAGCAAC-3'       |
| <i>AtIPT9</i>                     | Forward; 5'-TTGGCAGTGGCGTATTTTTG-3'     |
| <i>AT5G20040</i>                  | Reverse; 5'-AAGGCTTGGCGGTTGAAGT-3'      |
|                                   | Probe; 5'-CCCGTACCTGTTACTTG-3'          |
| <i>AtCytokinin oxidase (CKX)1</i> | Forward; 5'-CGGGCTTGGACAGTTTGG-3'       |
| <i>gi 20196946</i>                | Reverse; 5'-CGGTGCTGGTTCAAGAGAGAT-3'    |
|                                   | Probe; 5'-ATAATCACCCGGGCACG-3'          |
| <i>AtCKX2</i>                     | Forward; 5'-CTCCCCATCATCAGCAAGGT-3'     |
| <i>AT2G19500</i>                  | Reverse; 5'-ATGAACCCGGGCAAGTAACTTA-3'   |
|                                   | Probe; 5'-TGACACATTAACGAAAACA-3'        |
| <i>AtCKX3</i>                     | Forward; 5'-CCAAGGACATGAACTCGGATCT-3'   |
| <i>AT5G56970</i>                  | Reverse; 5'-TTATAATGCCGAATTGACCCAAAC-3' |
|                                   | Probe; 5'-TTCTTCGCGGTGTTAGGA-3'         |
| <i>AtCKX4</i>                     | Forward; 5'-CCATCTCTGCCGCTTCTCA-3'      |

|                                          |                                        |
|------------------------------------------|----------------------------------------|
| <i>AT4G29740</i>                         | Reverse; 5'-GCGCCGGGATTTTCG-3'         |
|                                          | Probe; 5'-ACTTCGGTAACATAACCG-3'        |
| <i>AtCKX5</i>                            | Forward; 5'-TGCGGGTTCGGTTCTTTATTG-3'   |
| <i>AF303981</i>                          | Reverse; 5'-TGAGTTGGAATCGGAGTCTCTGT-3' |
|                                          | Probe; 5'-TCGAACTCGGTCTTCA-3'          |
| <i>AtCKX6</i>                            | Forward; 5'-GATGTCGACGGCCACTTCA-3'     |
| <i>AT1G75450</i>                         | Reverse; 5'-GTCTGAGGAGACGGAGGCTAAG-3'  |
|                                          | Probe; 5'-CGTCCACCCTTCC-3'             |
| <i>AtActin2/7</i>                        | Forward; 5'-GCCATTCAGGCCGTTCTTT-3'     |
| <i>AY102779</i>                          | Reverse; 5'-ATCGAGCACAATACCGGTTGT-3'   |
|                                          | Probe; 5'-TCTATGCCAGTGGTCG-3'          |
| <i>ABA-responsive protein-related</i>    | Forward; 5'-GCCACTGGCCAGACTAAGGA-3'    |
| <i>At3g02480</i>                         | Reverse; 5'-CAAGGAGTCTTGAGCTGAAGCA-3'  |
| <i>Xyloglucan endotransglycosylase 6</i> | Forward; 5'-TTTCCTAAGAACCAGCCAATGAG-3' |
| <i>At4g25810</i>                         | Reverse; 5'-TTGACGAGACCACCCTTGT-3'     |
| <i>basic helix-loop-helix (bHLH)</i>     | Forward; 5'-CCGACATCTCGGGTGATAGAA-3'   |
| <i>At5g43650</i>                         | Reverse; 5'-CCTCAGTTCCGTGTCCTTCATAT-3' |

|                                                                    |                                         |
|--------------------------------------------------------------------|-----------------------------------------|
| <i>ethylene-responsive transcription factor RAP2.6</i>             | Forward; 5'- TGCCTTGGAGAGGCCAAAA-3'     |
| <i>At1g43160</i>                                                   | Reverse; 5'- CATACACGTGTCGCCTTGTGT-3'   |
| <hr/> <i>unknown protein</i>                                       | Forward; 5'- CACCACCAGTTTTTGGAGATT-3'   |
| <i>At5g24640</i>                                                   | Reverse; 5'- CCGCTCACTTTCTCCGATGA-3'    |
| <hr/> <i>ATNAC3 (Arabidopsis NAC domain containing protein 55)</i> | Forward; 5'-TCGACGGAGGGAAGAAGAGTT-3'    |
| <i>At3g15500</i>                                                   | Reverse; 5'- TTGGTTTTGGTTCCTTTTGGGA-3'  |
| <hr/> <i>ACD6 (Accelerated cell death 6)</i>                       | Forward; 5'- CCCATGTGAAATGGCTTTTAGTC-3' |
| <i>At4g14400</i>                                                   | Reverse;5'- AGGGCCAAGGATAAAGATTGC-3'    |
| <hr/> <i>PLAC8 domain containing protein</i>                       | Forward; 5'- TTTGCTGTAACTCTGTGCTTTG-3'  |
| <i>At1g14880</i>                                                   | Reverse; 5'- TGCCCATCCAAGGCTCATAT-3'    |
| <hr/>                                                              |                                         |
